# Supplementary material for: A Genome-Wide Copy Number Variant Study of Suicidal Behavior
Source: PubMed Central journal article supplement (PMC4444178; doi:10.1371/journal.pone.0128369), 2015-05-26

A)

### Chromosome 3, Deletion, logRratio

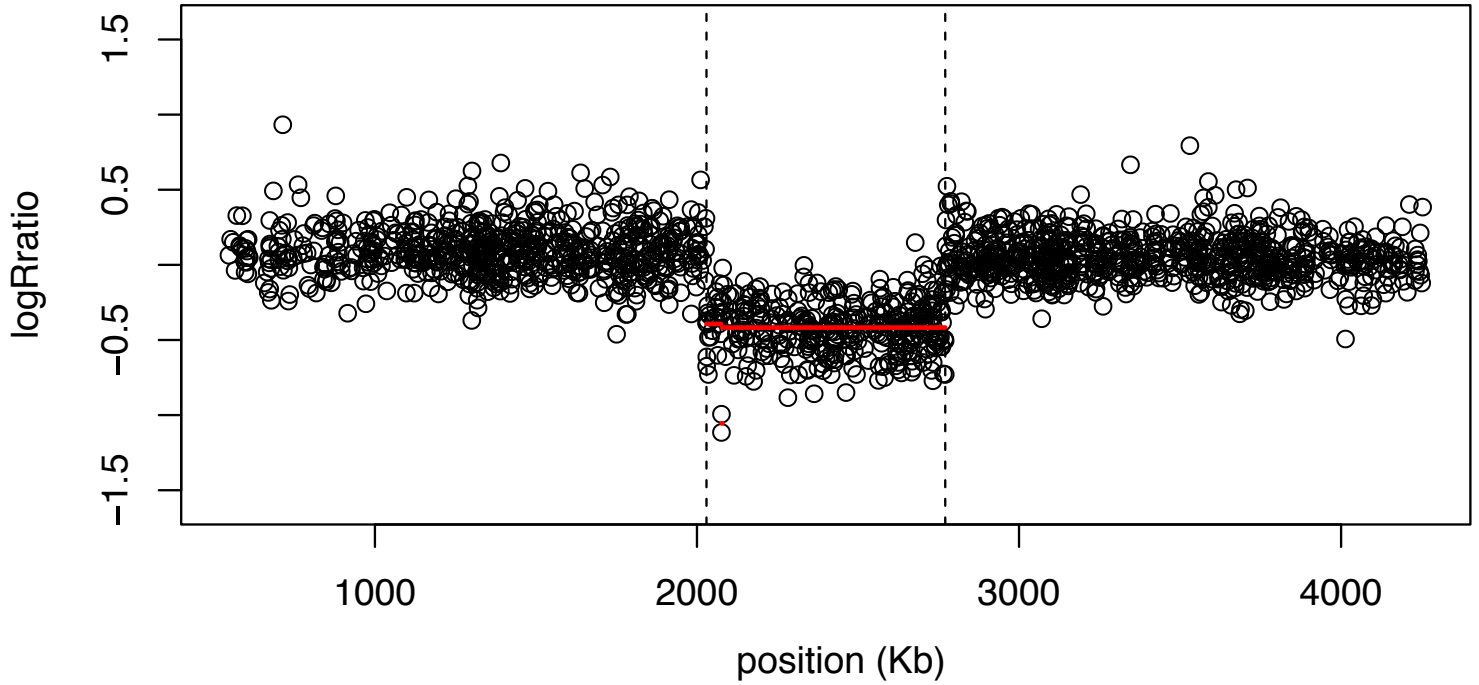

B)

### POSITIVE CONTROL FOR qPCR VALIDATION

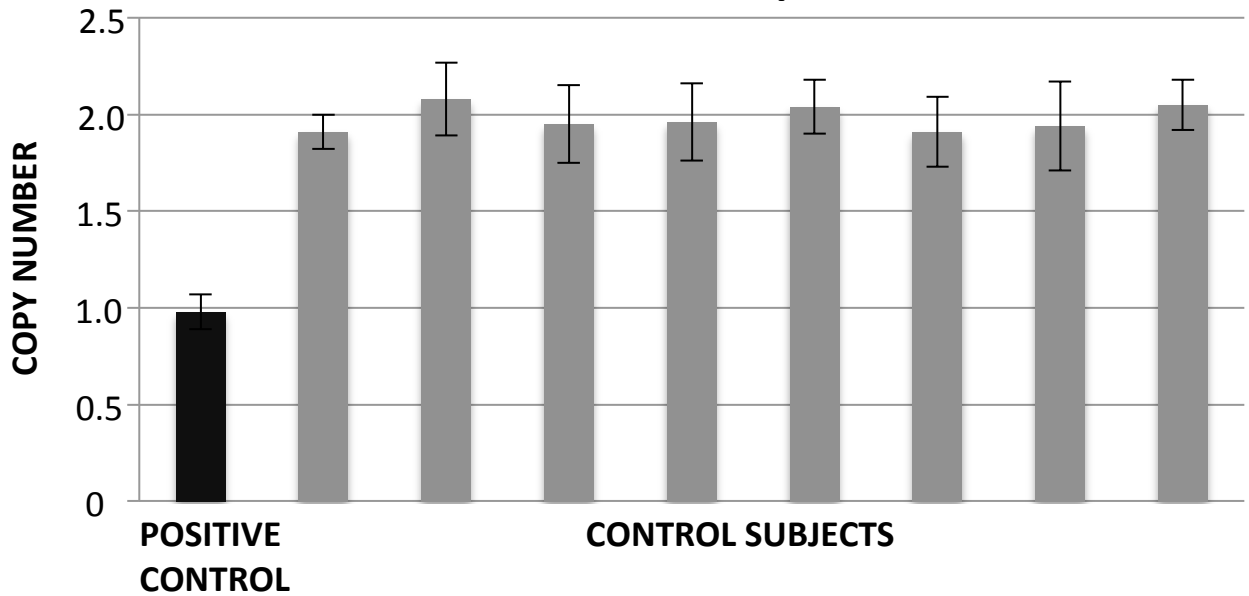

Supplement: pone.0128369.s001.pdf [file pone.0128369.s001.pdf]
